# Supplementary material
Source: PubMed Central journal article supplement (PMC3128772)
Supplement: Supp_Data.pdf [file Supp_Data.pdf]

SUPPLEMENTARY TABLE S1. NEURAL STEM CELL GENES UPREGULATED WITH COCULTURE

| Gene                                                                      | Official symbol  | Gene ID | Mean SI |                  |                   | Fold change |
|---------------------------------------------------------------------------|------------------|---------|---------|------------------|-------------------|-------------|
|                                                                           |                  |         | CC      | Neural stem cell |                   |             |
| Prostate transmembrane protein, androgen induced 1                        | <i>Ptnepa1</i>   | 311676  | 5149.44 | 248.37           | 20.73             |             |
| Putative ISG12(b) protein                                                 | <i>Isg12(b)</i>  | 299269  | 986.1   | 97.5             | 10.11             |             |
| Adrenomedullin                                                            | <i>Adm</i>       | 25026   | 76.38   | 10.08            | 7.57              |             |
| Reelin                                                                    | <i>Reln</i>      | 24718   | 1532.76 | 251.19           | 6.1               |             |
| S100 calcium binding protein A10 (calpactin)                              | <i>S100a10</i>   | 81778   | 6310.98 | 1201.41          | 5.25              |             |
| Neuronal pentraxin receptor                                               | <i>Nptxr</i>     | 81005   | 1731.65 | 366.06           | 4.73              |             |
| Lymphoid enhancer binding factor 1                                        | <i>Lef1</i>      | 161452  | 980.99  | 238.54           | 4.11              |             |
| Procollagen, type IV, alpha 2 (predicted)                                 | <i>Col4a2</i>    | 306628  | 695.04  | 178.45           | 3.89              |             |
| Carbohydrate sulfotransferase 2 (predicted)                               | <i>Chst2</i>     | 367145  | 2177.71 | 589.44           | 3.69              |             |
| Tenascin R                                                                | <i>Tnr</i>       | 25567   | 736.91  | 199.83           | 3.69 <sup>a</sup> |             |
| Procollagen, type IV, alpha 1                                             | <i>Col4a1</i>    | 290905  | 3986.83 | 1128.57          | 3.53              |             |
| Retinol binding protein 1, cellular                                       | <i>Rbp1</i>      | 25056   | 719.51  | 211.61           | 3.4               |             |
| Cyclin-dependent kinase inhibitor 1C (P57)                                | <i>Cdkn1c</i>    | 246060  | 2029.79 | 614.93           | 3.3               |             |
| ATPase, Na <sup>+</sup> /K <sup>+</sup> -transporting, beta 2 polypeptide | <i>Atp1b2</i>    | 24214   | 796.92  | 254.67           | 3.13              |             |
| Early growth response 2                                                   | <i>Egr2</i>      | 114090  | 284.26  | 91.27            | 3.11              |             |
| Cyclin D2                                                                 | <i>Ccnb2</i>     | 64033   | 3779.89 | 1238.54          | 3.05              |             |
| Procollagen, type XI, alpha 1                                             | <i>Col11a1</i>   | 25654   | 450.83  | 150.55           | 2.99              |             |
| Protein S (alpha)                                                         | <i>Pros1</i>     | 81750   | 541.73  | 183.93           | 2.95              |             |
| Activating transcription factor 3                                         | <i>Atf3</i>      | 25389   | 259.16  | 94.13            | 2.75              |             |
| Septin 4                                                                  | <i>Sept4</i>     | 287606  | 537.43  | 195.96           | 2.74              |             |
| Bone morphogenetic protein 4                                              | <i>Bmp4</i>      | 25296   | 841.93  | 307.96           | 2.73              |             |
| Complement component 1, q subcomponent-like 1 (predicted)                 | <i>C1ql1</i>     | 363686  | 2889.56 | 1138.25          | 2.54              |             |
| Protein kinase C, eta                                                     | <i>Prkch</i>     | 81749   | 117.86  | 47.76            | 2.47              |             |
| Tumor necrosis factor receptor superfamily, member 11b (osteoprotegerin)  | <i>Tnfrsf11b</i> | 25341   | 776.83  | 314.04           | 247 <sup>a</sup>  |             |
| Matrix metalloproteinase 11                                               | <i>Mmp11</i>     | 25481   | 215.18  | 89.25            | 2.41              |             |
| Early growth response 1                                                   | <i>Egr1</i>      | 24330   | 6612.23 | 2821.33          | 2.34              |             |
| Coagulation factor III                                                    | <i>F3</i>        | 25584   | 1306.03 | 557.82           | 2.34              |             |
| Calcitonin receptor-like                                                  | <i>Calcr1</i>    | 25029   | 735.92  | 317.79           | 2.32              |             |
| Dipeptidylpeptidase 6                                                     | <i>Dpp6</i>      | 29272   | 161.37  | 71.33            | 2.26              |             |
| Glutamate receptor, ionotropic, AMPA3 (alpha 3)                           | <i>Gria3</i>     | 29628   | 287.22  | 128.93           | 2.23              |             |
| Plasma membrane proteolipid                                               | <i>Pf1p</i>      | 64364   | 3038.5  | 1366.5           | 2.22              |             |
| Fas apoptotic inhibitory molecule                                         | <i>Faim</i>      | 140930  | 2661.26 | 1209.6           | 2.2               |             |
| Ribose 5-phosphate isomerase A (predicted)                                | <i>Rpia</i>      | 362383  | 598.48  | 271.61           | 2.2               |             |
| Meteorin, glial cell differentiation regulator                            | <i>Metrn</i>     | 287151  | 4441.11 | 2042.79          | 2.17              |             |
| Immediate early response 2                                                | <i>Ier2</i>      | 494344  | 1979.92 | 923.6            | 2.14              |             |
| Signal transducer and activator of transcription 3                        | <i>Stat3</i>     | 25125   | 1707.16 | 803.09           | 2.13              |             |
| G0/G1 switch gene 2                                                       | <i>G0s2</i>      | 289388  | 1231.9  | 580.46           | 2.12              |             |
| Sulfatase 2                                                               | <i>Sulf2</i>     | 311642  | 5972.93 | 2822.77          | 2.12              |             |
| Fibroblast growth factor receptor-like 1                                  | <i>Fgfr1l</i>    | 360903  | 1788.7  | 849.07           | 2.11              |             |
| Chondroitin sulfate proteoglycan 2                                        | <i>Cspg2</i>     | 114122  | 2106.94 | 1018.83          | 2.07              |             |

<sup>a</sup>Multiple probes met the filtering criteria. Representative signal intensities and fold change are given for a single probe.

SUPPLEMENTARY TABLE S2. NEURAL STEM CELL GENES DOWNREGULATED WITH COCULTURE

| <i>Gene</i>                                                                        | <i>Official symbol</i> | <i>Gene ID</i> | <i>Mean SI</i>          |                    | <i>Fold change</i> |
|------------------------------------------------------------------------------------|------------------------|----------------|-------------------------|--------------------|--------------------|
|                                                                                    |                        |                | <i>Neural stem cell</i> | <i>CC</i>          |                    |
| Matrix metalloproteinase 13                                                        | <i>Mmp13</i>           | 171052         | 22.44                   | 1 <sup>a</sup>     | -22.44             |
| ATPase, H <sup>+</sup> -transporting, lysosomal V0 subunit a isoform 2             | <i>Atpv0a2</i>         | 116455         | 18.06                   | 1 <sup>a</sup>     | -18.06             |
| Taste receptor, type 2, member 105                                                 | <i>Tas2r105</i>        | 78985          | 17.7                    | 1 <sup>a</sup>     | -17.7              |
| Vav 1 oncogene                                                                     | <i>Vav1</i>            | 25156          | 38.46                   | 2.91 <sup>a</sup>  | -13.24             |
| Minichromosome maintenance deficient 3 ( <i>S. cerevisiae</i> ) associated protein | <i>Mcm3ap</i>          | 294339         | 40.47                   | 30.6 <sup>a</sup>  | -13.21             |
| Sialic acid binding Ig-like lectin 10 (predicted)                                  | <i>Siglec10</i>        | 292844         | 26.9                    | 3.02 <sup>a</sup>  | -8.91              |
| RT1 class Ib, locus M3                                                             | <i>RT1-M3</i>          | 24747          | 29.05                   | 5.04 <sup>a</sup>  | -5.76              |
| TBK1 binding protein 1                                                             | <i>Tbkbp1</i>          | 266764         | 21.3                    | 4.21 <sup>a</sup>  | -5.06              |
| Carboxypeptidase×2 (M14 family) (predicted)                                        | <i>Cpxm2</i>           | 293566         | 32.74                   | 6.57 <sup>a</sup>  | -4.98              |
| FCH and double SH3 domains 2 (predicted)                                           | <i>Fchsd2</i>          | 308864         | 58.6                    | 12.75              | -4.6               |
| FERM and PDZ domain containing 1 (predicted)                                       | <i>Frrmpd1</i>         | 313244         | 52.36                   | 11.78 <sup>a</sup> | -4.44              |
| Carbonic anhydrase 3                                                               | <i>Ca3</i>             | 54232          | 15.96                   | 3.69 <sup>a</sup>  | -4.33              |
| Caspase 12                                                                         | <i>Casp12</i>          | 156117         | 48.63                   | 11.42 <sup>a</sup> | -4.26 <sup>b</sup> |
| Urinary protein 2                                                                  | <i>Rup2</i>            | 619560         | 35.82                   | 9.05 <sup>a</sup>  | -3.96              |
| MAM domain containing 4                                                            | <i>Mamdc4</i>          | 252882         | 58.3                    | 15.18 <sup>a</sup> | -3.84              |
| Otoferlin                                                                          | <i>Otof</i>            | 84573          | 23.91                   | 6.52 <sup>a</sup>  | -3.67              |
| Cadherin 11                                                                        | <i>Cdh11</i>           | 84407          | 54.49                   | 15.09 <sup>a</sup> | -3.61              |
| Ubiquitin specific protease 42 (predicted)                                         | <i>Usp42</i>           | 288482         | 57.88                   | 16.58 <sup>a</sup> | -3.49              |
| Dnajf (Hsp40) homolog, subfamily C, member 2                                       | <i>Dnajc2</i>          | 116456         | 37.48                   | 11.25              | -3.33              |
| Lipoprotein lipase                                                                 | <i>Lpl</i>             | 24539          | 277.89                  | 83.45 <sup>a</sup> | -3.33              |
| Plexin C1 (predicted)                                                              | <i>Plxnc1</i>          | 362873         | 135.4                   | 40.68              | -3.33              |
| Insulin-like growth factor 1                                                       | <i>Igf1</i>            | 24482          | 30.3                    | 9.56 <sup>a</sup>  | -3.17              |
| Gamma-aminobutyric acid (GABA) A receptor, subunit gamma 3                         | <i>Gabrg3</i>          | 79211          | 178.41                  | 59.56 <sup>a</sup> | -3                 |
| Apelin, AGTRL1 ligand                                                              | <i>Apln</i>            | 58812          | 76.34                   | 25.81 <sup>a</sup> | -2.96              |
| Chemokine orphan receptor 1                                                        | <i>Ckior1</i>          | 84348          | 219.09                  | 75.63              | -2.9               |
| Solute carrier family 33 (acetyl-CoA transporter), member 1                        | <i>Slc33a1</i>         | 64018          | 26.28                   | 9.44 <sup>a</sup>  | -2.78              |
| Retinal G protein coupled receptor (predicted)                                     | <i>Rgr</i>             | 306307         | 356.73                  | 145.6              | -2.45              |
| Dihydropyrimidinase-like 5                                                         | <i>Dpysl5</i>          | 65208          | 153.41                  | 63.52 <sup>a</sup> | -2.41              |
| ATPase, Na <sup>+</sup> /K <sup>+</sup> -transporting, beta 3 polypeptide          | <i>Apl1b3</i>          | 25390          | 32.29                   | 14.03 <sup>a</sup> | -2.3               |

<sup>a</sup>Signal absent in coculture.

<sup>b</sup>Multiple probes met the filtering criteria. Representative signal intensities and fold change are given for a single probe.

SUPPLEMENTARY TABLE S3. MESENCHYMAL STROMAL CELL GENES UPREGULATED WITH COCULTURE

| Gene                                                                                     | Official symbol | Gene ID | Mean SI |                          | Fold change       |
|------------------------------------------------------------------------------------------|-----------------|---------|---------|--------------------------|-------------------|
|                                                                                          |                 |         | CC      | Mesenchymal stromal cell |                   |
| ATP-binding cassette, sub-family A (ABC1), member 1                                      | ABCA1           | 19      | 4140.54 | 92.66                    | 44.68             |
| Collagen, type IV, alpha 1                                                               | COL4A1          | 1282    | 6827.88 | 783.75                   | 8.71              |
| Inhibitor of DNA binding 3, dominant negative helix-loop-helix protein                   | ID3             | 3399    | 1999.21 | 237.79                   | 8.41              |
| Endothelin receptor type A                                                               | EDNRA           | 1909    | 2929.32 | 463.59                   | 6.32 <sup>a</sup> |
| Hairy and enhancer of split 1 (Drosophila)                                               | HES1            | 3280    | 2912.21 | 540.21                   | 5.39 <sup>a</sup> |
| Notch homolog 3 (Drosophila)                                                             | NOTCH3          | 4854    | 3441.03 | 684.13                   | 5.03              |
| Solute carrier family 7 (cationic amino acid transporter, y+system) member 11            | SLC7A11         | 23657   | 2587.2  | 568.35                   | 4.55 <sup>a</sup> |
| Immediate early response 5-like                                                          | IER5L           | 389792  | 508.25  | 112.55                   | 4.52              |
| Unc-5 homolog B (C. elegans)                                                             | UNC5B           | 219699  | 2290.89 | 544.09                   | 4.21              |
| Biglycan                                                                                 | BGN             | 633     | 5785.87 | 1380.49                  | 4.19 <sup>a</sup> |
| Jagged 1 (Alagille syndrome)                                                             | JAG1            | 182     | 2368.63 | 567.35                   | 4.17 <sup>a</sup> |
| Collagen, type IV, alpha 2                                                               | COL4A2          | 1284    | 8265.82 | 2075.16                  | 3.98 <sup>a</sup> |
| Endothelial differentiation, sphingolipid G-protein-coupled receptor, 3                  | EDG3            | 1903    | 1858.04 | 481.63                   | 3.86              |
| Collagen, type 1, alpha 1                                                                | COL1A1          | 1277    | 9801.77 | 2548.83                  | 3.85 <sup>a</sup> |
| SRY (sex determining region Y)-box 4                                                     | SOX4            | 6659    | 1375.41 | 363.36                   | 3.79              |
| Tumor necrosis factor, alpha-induced protein 6                                           | TNFAIP6         | 7130    | 1891.21 | 503.71                   | 3.75 <sup>a</sup> |
| Syndecan 2                                                                               | SDC2            | 6383    | 4269.44 | 1164.59                  | 3.67 <sup>a</sup> |
| Sphingosine kinase 1                                                                     | SPHK1           | 8877    | 2190.19 | 597.8                    | 3.66              |
| G0/G1switch 2                                                                            | GOS2            | 50486   | 2765.57 | 791.02                   | 3.5               |
| Collagen, type V, alpha 1                                                                | COL5A1          | 1289    | 2178.9  | 630.53                   | 3.46 <sup>a</sup> |
| Uveal autoantigen with coiled-coil domains and ankyrin repeats                           | UACA            | 55075   | 3474.18 | 1048.37                  | 3.31              |
| Bone morphogenetic protein 1                                                             | BMP1            | 649     | 905.83  | 276.86                   | 3.27 <sup>a</sup> |
| Collagen, type III, alpha 1                                                              | COL3A1          | 1281    | 12297   | 3763.29                  | 3.27              |
| Phosphoglycerate dehydrogenase                                                           | PHGDH           | 26227   | 2425.24 | 785.16                   | 3.09              |
| Hydroxyacylglutathione hydrolase                                                         | HAGH            | 3029    | 820     | 271.7                    | 3.02              |
| Kruppel-like factor 9                                                                    | KLF9            | 687     | 566.4   | 190.59                   | 2.97              |
| Growth differentiation factor 15                                                         | GDF15           | 9518    | 916.03  | 317.01                   | 2.89              |
| Plectstrin homology, Sec7 and coiled-coil domains 3                                      | PSCD3           | 9265    | 1195.05 | 418.69                   | 2.85              |
| Olfactomedin-like 2B                                                                     | OLFML2B         | 25903   | 1033.2  | 364.24                   | 2.84              |
| Snail homolog 2 (Drosophila)                                                             | SNAI2           | 6591    | 6154.47 | 2178.95                  | 2.82              |
| Matrix metalloproteinase 14 (membrane-inserted)                                          | MMP14           | 4323    | 3488.5  | 1239.89                  | 2.81 <sup>a</sup> |
| SMAD family member 3                                                                     | SMAD3           | 4088    | 1092.02 | 405.37                   | 2.69 <sup>a</sup> |
| Versican                                                                                 | VCAN            | 1462    | 3976.6  | 1480.22                  | 2.69              |
| Sine oculis homeobox homolog 2                                                           | SIX2            | 10736   | 1674.3  | 628.2                    | 2.67              |
| Phosphoserine aminotransferase 1                                                         | PSATI           | 29968   | 1049.7  | 404.93                   | 2.59              |
| Platelet-derived growth factor receptor, beta polypeptide                                | PDGFRB          | 5159    | 8776.75 | 3419.68                  | 2.57              |
| Transmembrane protein with epidermal growth factor-like and 2 follistatin-like domains 2 | TMEFF2          | 23671   | 516.4   | 206.26                   | 2.5               |
| Sulfatase 1                                                                              | SULF1           | 23213   | 2079.53 | 839.63                   | 2.48 <sup>a</sup> |
| Collagen, type V, alpha 2                                                                | COL5A2          | 1290    | 8902.25 | 3613.43                  | 2.46              |
| Periostin, osteoblast specific factor                                                    | POSTN           | 10631   | 5311.35 | 2162.62                  | 2.46              |
| Protein kinase C substrate 80K-H                                                         | PRKCSH          | 5589    | 6619.26 | 2692.38                  | 2.46              |
| Collagen, type VI, alpha 1                                                               | COL6A1          | 1291    | 6216.84 | 2537.67                  | 2.45 <sup>a</sup> |
| Non-POU domain containing, octamer-binding                                               | NONO            | 4841    | 4272.48 | 1774                     | 2.41              |

(Continued)

SUPPLEMENTARY TABLE S3. (CONTINUED)

| <i>Gene</i>                                                | <i>Official symbol</i> | <i>Gene ID</i> | <i>Mean SI</i> |                                 | <i>Fold change</i> |
|------------------------------------------------------------|------------------------|----------------|----------------|---------------------------------|--------------------|
|                                                            |                        |                | <i>CC</i>      | <i>Mesenchymal stromal cell</i> |                    |
| Nidogen 2 (osteonidogen)                                   | NID2                   | 22795          | 3401.83        | 1418.5                          | 2.4                |
| ADP-ribosylation factor-like 4C                            | ARL4C                  | 10123          | 3769.87        | 1579.94                         | 2.39               |
| Cystathionine-beta-synthase                                | CBS                    | 875            | 1158.87        | 484.03                          | 2.39               |
| Transforming growth factor, beta 1                         | TGFB1                  | 7040           | 3855.04        | 1630.09                         | 2.36               |
| Zinc finger protein 286A                                   | ZNF286A                | 57335          | 78.77          | 33.48                           | 2.35               |
| Thy-1 cell surface antigen                                 | THY1                   | 7070           | 2911.47        | 1243.27                         | 2.34               |
| AE binding protein 1                                       | AEBP1                  | 165            | 2144.08        | 926                             | 2.32               |
| Cytochrome P450, family 1, subfamily B, polypeptide 1      | CYP1B1                 | 1545           | 1271.54        | 548.44                          | 2.32 <sup>a</sup>  |
| KIT ligand                                                 | KITLG                  | 4254           | 3485.92        | 1506.58                         | 2.31               |
| Glypican 1                                                 | GPC1                   | 2817           | 4006.7         | 1738.92                         | 2.3                |
| Myristoylated alanine-rich protein kinase C substrate      | MARCKS                 | 4082           | 3402.36        | 1498.96                         | 2.27               |
| Nuclear protein 1                                          | NUPRI                  | 26471          | 1406.95        | 619.46                          | 2.27               |
| Endothelin converting enzyme 1                             | ECE1                   | 1889           | 2132.1         | 944.14                          | 2.26               |
| Endothelial PAS domain protein 1                           | EPAS1                  | 2034           | 4740.76        | 2110.07                         | 2.25               |
| Cysteine rich transmembrane BMP regulator 1 (chordin-like) | CRIMI                  | 51232          | 3919.31        | 1782.58                         | 2.2                |
| GTP binding protein overexpressed in skeletal muscle       | GEM                    | 2669           | 2180.75        | 1009.98                         | 2.16               |

<sup>a</sup>Multiple probes met the filtering criteria. Representative signal intensities and fold change are given for a single probe.

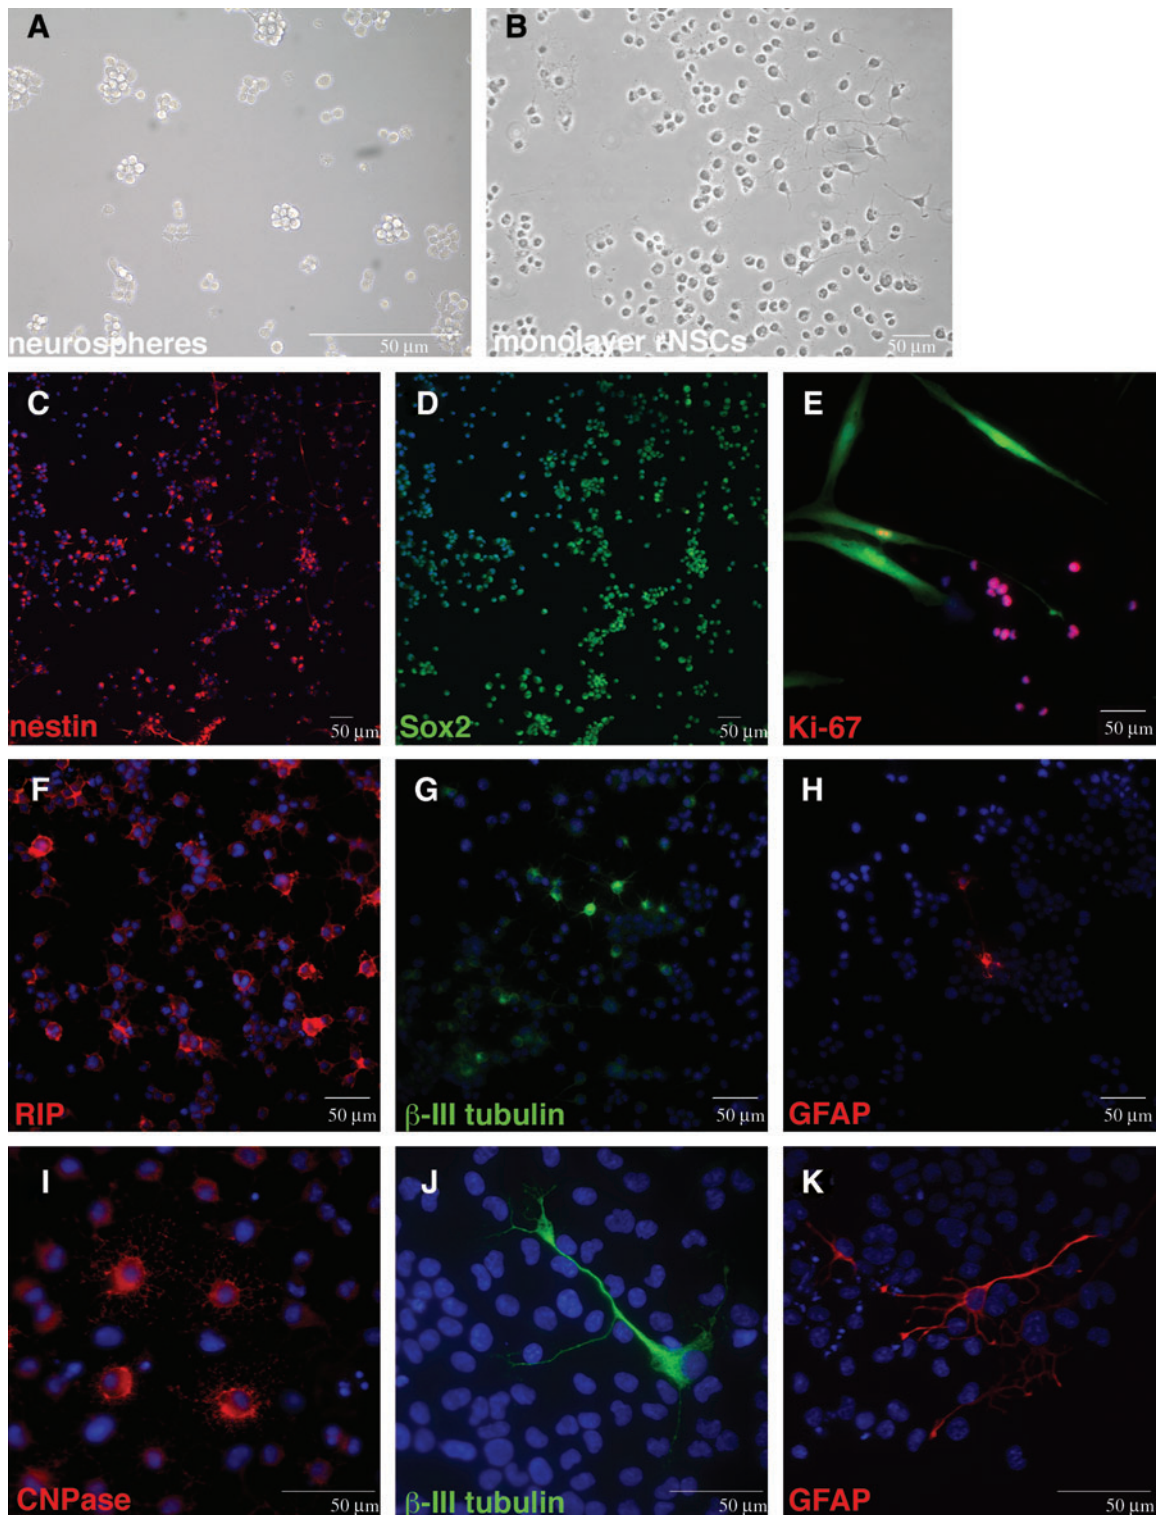

**SUPPLEMENTARY FIG. S1.** Characterization of rNSCs. (A) Before the start of experiments, rNSCs were propagated as nonadherent neurospheres in optimal rNSC growth medium. (B) For coculture experiments rNSCs were seeded on coated plates and grown as a monolayer (image was taken postfixation). Immunocytochemistry revealed that rNSCs grown in optimal growth medium expressed the characteristic NSC markers (C) nestin (red) and (D) Sox2 (green). (E) Both rNSCs and GFP+hMSCs in coculture expressed the cell proliferation marker Ki-67 (red). rNSCs cultured in differentiation medium expressed phenotypic markers of (F, I) oligodendrocytes (F-RIP and I-CNPase, red), (G, J) neurons ( $\beta$ -III tubulin, green), and (H, K) astrocytes (GFAP, red). (C–K) Nuclei were stained with DAPI (blue). All scale bars = 50  $\mu$ m. rNSC, rat neural stem cell; hMSC, human mesenchymal stromal cell; GFAP, glial fibrillary acidic protein; GFP, green fluorescent protein; CNPase, 2',3'-cyclic nucleotide 3'-phospho-diesterase; RIP, anti-oligodendrocytes antibody.

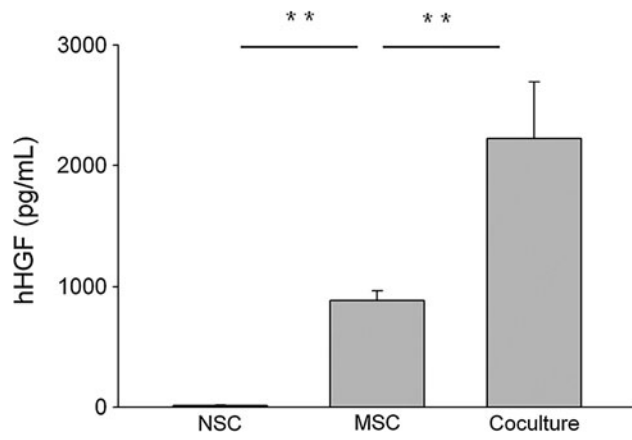

**SUPPLEMENTARY FIG. S2.** hMSCs increased secretion of HGF in cocultures. Human-specific ELISA of medium from cultures (*t*-test:  $**P < 0.01$  vs. coculture). HGF, hepatocyte growth factor.
